# Supplementary material for: Effect of Bear Garlic Addition on the Chemical Composition, Microbiological Quality, Antioxidant Capacity, and Degree of Proteolysis in Soft Rennet Cheeses Produced from Milk of Polish Red and Polish Holstein-Friesian Cows
Source: MDPI journal article supplement (doi:10.3390/molecules27248930), 2022-12-15
Supplement: s1 [file s1]

**Table S1:** Statistical effects from the ANOVA of free amino acid content (FAA) and OPA values in the analyzed fresh and stored cheeses.

| FAA/OPA   | MS        | ChT | S  | MS x ChT | MS x S | ChT x S | MS x ChT x S |
|-----------|-----------|-----|----|----------|--------|---------|--------------|
| ASP       | *         | *   | ns | *        | ns     | ns      | ns           |
| SER       | *         | *   | ns | *        | ns     | ns      | ns           |
| GLU       | *         | *   | ns | ns       | ns     | ns      | ns           |
| GLY       | *         | *   | *  | *        | ns     | ns      | ns           |
| HIS       | *         | *   | ns | *        | ns     | ns      | ns           |
| ARG       | *         | *   | ns | ns       | ns     | ns      | ns           |
| THR       | *         | ns  | *  | *        | ns     | ns      | ns           |
| PRO       | ns        | ns  | *  | ns       | ns     | ns      | ns           |
| ALA       | *         | *   | ns | *        | ns     | ns      | ns           |
| TYR       | *         | *   | ns | ns       | ns     | ns      | ns           |
| VAL       | *         | *   | ns | *        | ns     | ns      | ns           |
| MET       | *         | *   | ns | *        | ns     | ns      | ns           |
| LYS       | *         | *   | ns | *        | ns     | ns      | ns           |
| ILE       | *         | *   | ns | *        | ns     | ns      | ns           |
| LEU       | *         | *   | ns | *        | ns     | ns      | ns           |
| PHE       | ns        | *   | *  | *        | ns     | ns      | ns           |
| CYS       | nd in PHF | *   | *  | ns       | -      | -       | -            |
| Total FAA | *         | *   | *  | *        | ns     | ns      | ns           |
| OPA       | *         | *   | *  | *        | ns     | *       | ns           |

\* statistically significant impact at  $p \leq 0.05$ , ns - statistically not significant impact at  $p \leq 0.05$ ; nd in PHF – not detected in cheeses from PHF milk; MS – milk source (PR – Polish Red or PHF – Polish Holstein-Friesian cows); ChT - cheese type (N – natural, BG – with bear garlic); S – storage time (0w – fresh/ at 0 week, 2w – stored/ at 2<sup>nd</sup> week); \* - statistically significant effect at  $p \leq 0.05$ ; ns – statistically not significant effect ( $p > 0.05$ )
